# Supplementary material for: Genetic Diversity of Genes Controlling Unilateral Incompatibility in Japanese Cultivars of Chinese Cabbage
Source: Plants (Basel). 2021 Nov 15;10(11):2467. doi: 10.3390/plants10112467 (PMC8619800; doi:10.3390/plants10112467)
Supplement: Supplementary file 1 [file plants-10-02467-s001.zip]

Archive with 8 entries (8 files):
- Supplementary files_revise/Figure S1_revise.pdf
- Supplementary files_revise/Figure S2_revise.pdf
- Supplementary files_revise/Figure S3_revise.pdf
- Supplementary files_revise/Figure S4_revise.pdf
- Supplementary files_revise/TableS1.pdf
- Supplementary files_revise/TableS2.pdf
- Supplementary files_revise/TableS3.pdf
- Supplementary files_revise/TableS4.pdf
