# Supplementary material for: Genetic Diversity of Genes Controlling Unilateral Incompatibility in Japanese Cultivars of Chinese Cabbage
Source: Plants (Basel). 2021 Nov 15;10(11):2467. doi: 10.3390/plants10112467 (PMC8619800; doi:10.3390/plants10112467)
Supplement: Supplementary file 1 [file plants-10-02467-s001.zip › Supplementary files_revise/Figure S4_revise.pdf]

| PCP-like1-F1 1st exon |      |                                                                |     |
|-----------------------|------|----------------------------------------------------------------|-----|
| <i>PUI1-1</i>         | 1:   | CACCTCTAGTTCATTATCTAAGAATGAAAAATTCTTTTCAACCTTCGATTATTGGTTTCTT  | 60  |
| <i>pui1-3</i>         | 1:   | .....                                                          | 60  |
| <i>pui1-4</i>         | 1:   | .....                                                          | 60  |
| <i>pui1-6</i>         | 1:   | .....                                                          | 60  |
|                       |      |                                                                |     |
| <i>PUI1-1</i>         | 61:  | TATGgtcacagttcttctgttcggttggtattttatattttacaattttattattatattca | 120 |
| <i>pui1-3</i>         | 61:  | .....                                                          | 120 |
| <i>pui1-4</i>         | 61:  | .....                                                          | 120 |
| <i>pui1-6</i>         | 61:  | .....                                                          | 120 |
|                       |      |                                                                |     |
| <i>PUI1-1</i>         | 121: | aaaattattttaaaattaatgttattctgatatcatattattttatgtactgatataattt  | 180 |
| <i>pui1-3</i>         | 121: | .....                                                          | 180 |
| <i>pui1-4</i>         | 121: | .....                                                          | 180 |
| <i>pui1-6</i>         | 121: | .....                                                          | 180 |
|                       |      |                                                                |     |
| <i>PUI1-1</i>         | 181: | ttttatcgaattctataattttgggttttagaaatttttccagaataatcaatgattaag   | 240 |
| <i>pui1-3</i>         | 181: | .....                                                          | 240 |
| <i>pui1-4</i>         | 181: | .....a.....                                                    | 240 |
| <i>pui1-6</i>         | 181: | .....                                                          | 240 |
|                       |      |                                                                |     |
| <i>PUI1-1</i>         | 241: | aaagaagatgttcatactttaagttttttttcttataaatatgcaaaaaa-ctctctaa    | 299 |
| <i>pui1-3</i>         | 241: | .....a.....                                                    | 300 |
| <i>pui1-4</i>         | 241: | .....-                                                         | 299 |
| <i>pui1-6</i>         | 241: | .....-                                                         | 299 |
|                       |      |                                                                |     |
| <i>PUI1-1</i>         | 300: | gcatatgtttttaccaaaaacattaatttctattttaaatacgaaaactaaagttttgtttt | 359 |
| <i>pui1-3</i>         | 301: | .....                                                          | 360 |
| <i>pui1-4</i>         | 300: | .....                                                          | 359 |
| <i>pui1-6</i>         | 300: | .....                                                          | 359 |
|                       |      |                                                                |     |
| 2nd exon PUI1-3.4.6F  |      |                                                                |     |
| <i>PUI1-1</i>         | 360: | aactattataataacagCAGTAATGACGACTGCTCAAGCTCAAGTACACAGATTTCCTTG   | 419 |
| <i>pui1-3</i>         | 361: | .....G.....                                                    | 420 |
| <i>pui1-4</i>         | 360: | .....G.....                                                    | 419 |
| <i>pui1-6</i>         | 360: | .....G.....                                                    | 419 |
|                       |      |                                                                |     |
| <i>PUI1-1</i>         | 420: | TCGACACATATACAGACCGAAAAATGGAAAAATGTGATTTGACCATTGTTCAGCTGAATG   | 479 |
| <i>pui1-3</i>         | 421: | .GA.....A..AC.....                                             | 480 |
| <i>pui1-4</i>         | 420: | .....Sall.....                                                 | 479 |
| <i>pui1-6</i>         | 420: | .GA.....A..AC.....                                             | 479 |
|                       |      |                                                                |     |
| <i>PUI1-1</i>         | 480: | TACCAAAGAAAGGGGAAGGCTTGGGATTGGTCGTTGTATGGATCCGCAAAATGAGATGTG   | 539 |
| <i>pui1-3</i>         | 481: | .....BamHI.....                                                | 540 |
| <i>pui1-4</i>         | 480: | .....G..G.....G.....                                           | 539 |
| <i>pui1-6</i>         | 480: | .....BsrI.....GC..G.....                                       | 539 |
|                       |      |                                                                |     |
| PUI1-3.4.6R           |      |                                                                |     |
| <i>PUI1-1</i>         | 540: | CGCATGCATGCATTATCAAAAGGCATAGAAAGAATGAGTGTATTATTTGATT'TTTTATC   | 599 |
| <i>pui1-3</i>         | 541: | .....                                                          | 600 |
| <i>pui1-4</i>         | 540: | .....                                                          | 599 |
| <i>pui1-6</i>         | 540: | .....                                                          | 599 |
|                       |      |                                                                |     |
| PCP-like1-R1          |      |                                                                |     |
| <i>PUI1-1</i>         | 600: | TACATTGGAACTCAAATAA                                            | 618 |
| <i>pui1-3</i>         | 601: | .....                                                          | 619 |
| <i>pui1-4</i>         | 600: | .....                                                          | 618 |
| <i>pui1-6</i>         | 600: | .....                                                          | 618 |

Figure S4. Nucleotide sequence alignment of *PUI1* alleles. Red lines indicate exon regions. The intron sequences are written in lowercase. Black boxes indicate the primer region used in this study. Red boxes indicate the recognition sites for BamHI, Sall, and BsrI.
