# Supplementary material for: Genetic Diversity of Genes Controlling Unilateral Incompatibility in Japanese Cultivars of Chinese Cabbage
Source: Plants (Basel). 2021 Nov 15;10(11):2467. doi: 10.3390/plants10112467 (PMC8619800; doi:10.3390/plants10112467)
Supplement: Supplementary file 1 [file plants-10-02467-s001.zip › Supplementary files_revise/TableS1.pdf]

Table S1. *PUI1* genotype in the selfed progeny of #101, 'Nanzan'.

| Sample number | <i>PUI1</i> genotype        |
|---------------|-----------------------------|
| #101-1        | <i>pui1-3/pui1-4</i>        |
| #101-3        | <i>pui1-3/pui1-4</i>        |
| #101-4        | <i>pui1-3/pui1-4</i>        |
| #101-5        | <i>pui1-3/pui1-4/pui1-6</i> |
| #101-7        | <i>pui1-3/pui1-4/pui1-6</i> |
| #101-8        | <i>pui1-3/pui1-4/pui1-6</i> |
| #101-9        | <i>pui1-3/pui1-4/pui1-6</i> |
| #101-10       | <i>pui1-3/pui1-4/pui1-6</i> |
| #101-11       | <i>pui1-3/pui1-4/pui1-6</i> |
| #101-12       | <i>pui1-3/pui1-4</i>        |
| #101-13       | <i>pui1-3/pui1-4/pui1-6</i> |
| #101-14       | <i>pui1-3/pui1-4/pui1-6</i> |
| #101-15       | <i>pui1-3/pui1-4</i>        |
| #101-16       | <i>pui1-3/pui1-4/pui1-6</i> |
| #101-17       | <i>pui1-3/pui1-4/pui1-6</i> |
| #101-18       | <i>pui1-3/pui1-4</i>        |
| #101-19       | <i>pui1-3/pui1-4/pui1-6</i> |
| #101-20       | <i>pui1-3/pui1-4/pui1-6</i> |
| #101-21       | <i>pui1-3/pui1-4/pui1-6</i> |
| #101-22       | <i>pui1-3/pui1-4/pui1-6</i> |
| #101-23       | <i>pui1-3/pui1-4/pui1-6</i> |
| #101-24       | <i>pui1-3/pui1-4/pui1-6</i> |
| #101-25       | <i>pui1-3/pui1-4</i>        |
| #101-26       | <i>pui1-3/pui1-4/pui1-6</i> |
| #101-27       | <i>pui1-3/pui1-4/pui1-6</i> |
| #101-28       | <i>pui1-3/pui1-4/pui1-6</i> |
| #101-29       | <i>pui1-3/pui1-4</i>        |
| #101-30       | <i>pui1-3/pui1-4/pui1-6</i> |
| #101-31       | <i>pui1-3/pui1-4</i>        |
| #101-32       | <i>pui1-3/pui1-4/pui1-6</i> |
| #101-33       | <i>pui1-3/pui1-4/pui1-6</i> |
| #101-34       | <i>pui1-3/pui1-4/pui1-6</i> |
| #101-35       | <i>pui1-3/pui1-4/pui1-6</i> |
| #101-36       | <i>pui1-3/pui1-4</i>        |
| #101-37       | <i>pui1-3/pui1-4/pui1-6</i> |
| #101-38       | <i>pui1-3/pui1-4/pui1-6</i> |
| #101-39       | <i>pui1-3/pui1-4/pui1-6</i> |
| #101-40       | <i>pui1-3/pui1-4/pui1-6</i> |
| #101-41       | <i>pui1-3/pui1-4</i>        |

|         |                             |
|---------|-----------------------------|
| #101-42 | <i>pui1-3/pui1-4/pui1-6</i> |
| #101-43 | <i>pui1-3/pui1-4/pui1-6</i> |
| #101-44 | <i>pui1-3/pui1-4/pui1-6</i> |
| #101-45 | <i>pui1-3/pui1-4/pui1-6</i> |
| #101-46 | <i>pui1-3/pui1-4/pui1-6</i> |
| #101-47 | <i>pui1-3/pui1-4/pui1-6</i> |
| #101-48 | <i>pui1-3/pui1-4/pui1-6</i> |
| #101-49 | <i>pui1-3/pui1-4</i>        |
| #101-50 | <i>pui1-3/pui1-4/pui1-6</i> |
| #101-51 | <i>pui1-3/pui1-4/pui1-6</i> |
| #101-52 | <i>pui1-3/pui1-4/pui1-6</i> |
| #101-53 | <i>pui1-3/pui1-4/pui1-6</i> |
| #101-54 | <i>pui1-3/pui1-4/pui1-6</i> |
| #101-55 | <i>pui1-3/pui1-4/pui1-6</i> |
| #101-56 | <i>pui1-3/pui1-4</i>        |
| #101-57 | <i>pui1-3/pui1-4/pui1-6</i> |
| #101-58 | <i>pui1-3/pui1-4/pui1-6</i> |
| #101-59 | <i>pui1-3/pui1-4/pui1-6</i> |
| #101-60 | <i>pui1-3/pui1-4/pui1-6</i> |
| #101-61 | <i>pui1-3/pui1-4</i>        |
| #101-62 | <i>pui1-3/pui1-4/pui1-6</i> |
| #101-63 | <i>pui1-3/pui1-4/pui1-6</i> |
| #101-64 | <i>pui1-3/pui1-4/pui1-6</i> |
| #101-66 | <i>pui1-3/pui1-4/pui1-6</i> |
| #101-67 | <i>pui1-3/pui1-4/pui1-6</i> |
| #101-68 | <i>pui1-3/pui1-4/pui1-6</i> |
| #101-69 | <i>pui1-3/pui1-4/pui1-6</i> |
| #101-70 | <i>pui1-3/pui1-4</i>        |
| #101-71 | <i>pui1-3/pui1-4/pui1-6</i> |
| #101-73 | <i>pui1-3/pui1-4</i>        |
| #101-74 | <i>pui1-3/pui1-4/pui1-6</i> |
| #101-75 | <i>pui1-3/pui1-4/pui1-6</i> |
| #101-76 | <i>pui1-3/pui1-4/pui1-6</i> |
| #101-77 | <i>pui1-3/pui1-4/pui1-6</i> |
| #101-78 | <i>pui1-3/pui1-4/pui1-6</i> |
| #101-79 | <i>pui1-3/pui1-4/pui1-6</i> |
| #101-80 | <i>pui1-3/pui1-4</i>        |
| #101-81 | <i>pui1-3/pui1-4/pui1-6</i> |
| #101-82 | <i>pui1-3/pui1-4/pui1-6</i> |

---
