# Supplementary material for: Genetic Diversity of Genes Controlling Unilateral Incompatibility in Japanese Cultivars of Chinese Cabbage
Source: Plants (Basel). 2021 Nov 15;10(11):2467. doi: 10.3390/plants10112467 (PMC8619800; doi:10.3390/plants10112467)
Supplement: Supplementary file 1 [file plants-10-02467-s001.zip › Supplementary files_revise/TableS2.pdf]

Table S2. *SUI1* genotype and stigma-side UI phenotype of selfed progeny of #83.

| Population         | Sample number | <i>SUI1</i> genotype             | Stigma-side UI phenotype |
|--------------------|---------------|----------------------------------|--------------------------|
| #83-S <sub>1</sub> | #83-self1     | <i>SUI1</i> -2/ <i>SUI1</i> -10  | UC                       |
|                    | #83-self2     | <i>SUI1</i> -2/ <i>SUI1</i> -2   | UI                       |
|                    | #83-self4     | <i>SUI1</i> -2/ <i>SUI1</i> -10  | UC                       |
|                    | #83-self5     | <i>SUI1</i> -2/ <i>SUI1</i> -10  | UC                       |
|                    | #83-self6     | <i>SUI1</i> -10/ <i>SUI1</i> -10 | UC                       |
|                    | #83-self8     | <i>SUI1</i> -2/ <i>SUI1</i> -10  | UC                       |
|                    | #83-self9     | <i>SUI1</i> -2/ <i>SUI1</i> -2   | UI                       |
|                    | #83-self11    | <i>SUI1</i> -10/ <i>SUI1</i> -10 | UC                       |
|                    | #83-self12    | <i>SUI1</i> -2/ <i>SUI1</i> -10  | UC                       |
|                    | #83-self13    | <i>SUI1</i> -2/ <i>SUI1</i> -2   | UI                       |
|                    | #83-self14    | <i>SUI1</i> -10/ <i>SUI1</i> -10 | UC                       |
| #83-S <sub>2</sub> | #83-4self1    | <i>SUI1</i> -2/ <i>SUI1</i> -10  | UC                       |
|                    | #83-4self2    | <i>SUI1</i> -2/ <i>SUI1</i> -2   | UI                       |
|                    | #83-4self3    | <i>SUI1</i> -2/ <i>SUI1</i> -2   | UI                       |
|                    | #83-4self4    | <i>SUI1</i> -2/ <i>SUI1</i> -2   | UI                       |
|                    | #83-4self5    | <i>SUI1</i> -10/ <i>SUI1</i> -10 | UC                       |
|                    | #83-4self6    | <i>SUI1</i> -10/ <i>SUI1</i> -10 | UC                       |
|                    | #83-4self7    | <i>SUI1</i> -2/ <i>SUI1</i> -10  | UC                       |
|                    | #83-4self8    | <i>SUI1</i> -2/ <i>SUI1</i> -10  | UC                       |
|                    | #83-4self9    | <i>SUI1</i> -2/ <i>SUI1</i> -10  | UC                       |
|                    | #83-4self10   | <i>SUI1</i> -2/ <i>SUI1</i> -2   | UI                       |
|                    | #83-4self11   | <i>SUI1</i> -2/ <i>SUI1</i> -10  | UC                       |
|                    | #83-4self12   | <i>SUI1</i> -2/ <i>SUI1</i> -10  | UC                       |
|                    | #83-4self13   | <i>SUI1</i> -2/ <i>SUI1</i> -2   | UI                       |
|                    | #83-4self14   | <i>SUI1</i> -10/ <i>SUI1</i> -10 | UC                       |
|                    | #83-4self15   | <i>SUI1</i> -2/ <i>SUI1</i> -2   | UI                       |
|                    | #83-4self16   | <i>SUI1</i> -2/ <i>SUI1</i> -10  | UC                       |
|                    | #83-4self17   | <i>SUI1</i> -2/ <i>SUI1</i> -10  | UC                       |
|                    | #83-4self18   | <i>SUI1</i> -10/ <i>SUI1</i> -10 | UC                       |
|                    | #83-4self19   | <i>SUI1</i> -2/ <i>SUI1</i> -2   | UI                       |
|                    | #83-4self20   | <i>SUI1</i> -2/ <i>SUI1</i> -2   | UI                       |
|                    | #83-4self21   | <i>SUI1</i> -2/ <i>SUI1</i> -2   | UI                       |
|                    | #83-4self22   | <i>SUI1</i> -2/ <i>SUI1</i> -2   | UI                       |
|                    | #83-4self23   | <i>SUI1</i> -10/ <i>SUI1</i> -10 | UC                       |
|                    | #83-4self24   | <i>SUI1</i> -10/ <i>SUI1</i> -10 | UC                       |
|                    | #83-5self1    | <i>SUI1</i> -10/ <i>SUI1</i> -10 | UC                       |

|             |                 |    |
|-------------|-----------------|----|
| #83-5self2  | SUI1-2/SUI1-10  | UC |
| #83-5self3  | SUI1-2/SUI1-10  | UC |
| #83-5self4  | SUI1-2/SUI1-10  | UC |
| #83-5self5  | SUI1-2/SUI1-2   | UI |
| #83-5self6  | SUI1-2/SUI1-10  | UC |
| #83-5self7  | SUI1-2/SUI1-10  | UC |
| #83-5self8  | SUI1-2/SUI1-10  | UC |
| #83-5self9  | SUI1-2/SUI1-2   | UI |
| #83-5self10 | SUI1-2/SUI1-2   | UI |
| #83-5self11 | SUI1-2/SUI1-10  | UC |
| #83-5self12 | SUI1-2/SUI1-2   | UI |
| #83-5self13 | SUI1-2/SUI1-10  | UC |
| #83-5self14 | SUI1-2/SUI1-10  | UC |
| #83-5self16 | SUI1-2/SUI1-2   | UI |
| #83-5self17 | SUI1-2/SUI1-2   | UI |
| #83-5self18 | SUI1-10/SUI1-10 | UC |
| #83-5self19 | SUI1-10/SUI1-10 | UC |
| #83-5self20 | SUI1-2/SUI1-2   | UI |
| #83-5self21 | SUI1-2/SUI1-10  | UC |
| #83-5self23 | SUI1-2/SUI1-10  | UC |
| #83-8self1  | SUI1-2/SUI1-10  | UC |
| #83-8self2  | SUI1-2/SUI1-2   | UI |
| #83-8self3  | SUI1-2/SUI1-10  | UC |
| #83-8self4  | SUI1-2/SUI1-2   | UI |
| #83-8self5  | SUI1-2/SUI1-2   | UI |
| #83-8self6  | SUI1-2/SUI1-10  | UC |
| #83-8self7  | SUI1-2/SUI1-10  | UC |
| #83-8self8  | SUI1-2/SUI1-10  | UC |
| #83-8self9  | SUI1-2/SUI1-10  | UC |
| #83-8self10 | SUI1-2/SUI1-10  | UC |
| #83-8self11 | SUI1-2/SUI1-2   | UI |
| #83-8self12 | SUI1-2/SUI1-10  | UC |
| #83-8self13 | SUI1-2/SUI1-10  | UC |
| #83-8self14 | SUI1-2/SUI1-10  | UC |
| #83-8self15 | SUI1-2/SUI1-10  | UC |
| #83-8self16 | SUI1-2/SUI1-10  | UC |
| #83-8self17 | SUI1-2/SUI1-10  | UC |
| #83-8self18 | SUI1-10/SUI1-10 | UC |
| #83-8self19 | SUI1-2/SUI1-10  | UC |

|              |                        |    |
|--------------|------------------------|----|
| #83-8self20  | <i>SUI1-2/SUI1-10</i>  | UC |
| #83-8self21  | <i>SUI1-2/SUI1-10</i>  | UC |
| #83-8self22  | <i>SUI1-2/SUI1-10</i>  | UC |
| #83-8self23  | <i>SUI1-2/SUI1-10</i>  | UC |
| #83-8self24  | <i>SUI1-10/SUI1-10</i> | UC |
| #83-12self1  | <i>SUI1-2/SUI1-2</i>   | UI |
| #83-12self3  | <i>SUI1-10/SUI1-10</i> | UC |
| #83-12self4  | <i>SUI1-2/SUI1-10</i>  | UC |
| #83-12self5  | <i>SUI1-10/SUI1-10</i> | UC |
| #83-12self6  | <i>SUI1-10/SUI1-10</i> | UC |
| #83-12self7  | <i>SUI1-10/SUI1-10</i> | UC |
| #83-12self8  | <i>SUI1-2/SUI1-10</i>  | UC |
| #83-12self9  | <i>SUI1-2/SUI1-10</i>  | UC |
| #83-12self10 | <i>SUI1-2/SUI1-10</i>  | UC |
| #83-12self11 | <i>SUI1-10/SUI1-10</i> | UC |
| #83-12self12 | <i>SUI1-2/SUI1-2</i>   | UI |

---
