# Supplementary material for: Genetic Diversity of Genes Controlling Unilateral Incompatibility in Japanese Cultivars of Chinese Cabbage
Source: Plants (Basel). 2021 Nov 15;10(11):2467. doi: 10.3390/plants10112467 (PMC8619800; doi:10.3390/plants10112467)
Supplement: Supplementary file 1 [file plants-10-02467-s001.zip › Supplementary files_revise/TableS3.pdf]

Table S3. Primers used in this study.

| Name             | Sequence                         |
|------------------|----------------------------------|
| SUI1cDNA_F3      | 5'-GTGATATGTAGCTTGCATGTGCTAGG-3' |
| SUI1_gR2         | 5'-AGTAATGGCAGAGTCAATGTTGGA-3'   |
| PCP-like1-F1     | 5'-CACCTCTAGTTCATTATCTAAG-3'     |
| PCP-like1-R1     | 5'-TTATTTGAGTTCCAATGTAG-3'       |
| SUIinter_cF1     | 5'-CATTCTTGTGGCAGAGTTTCG-3'      |
| SUIinter_cF2     | 5'-TAACTGTATCAGAGGCTTCGTACCA-3'  |
| SUIinter_cF3     | 5'-AAGTTCAATTGAACGAGATGGTG-3'    |
| SUIinter_GF1     | 5'-TATCAAGTAAGAAGTCAATAAGAG-3'   |
| SUI1inter_cF4    | 5'-CTTGGCTGTTGCGTTCAAGCCAACG-3'  |
| SUIinter_cF5     | 5'-GAAGCTAACACGAGGAAGGTGGTC-3'   |
| SUI1_2-10typeSDF | 5'-GATATGCAAAGAGAGGTGTCTTAGCG-3' |
| SUI1_2-10typeSDR | 5'-ACAAAGAGAGCATAACCGCCTTCG-3'   |
| PUI1-3.4.6-F     | 5'-GAGTAATGACGACTGCTCAAGCTC-3'   |
| PUI1-3.4.6-R     | 5'-AAATAAACACTCATCTTTGCTATGCC-3' |
