# Supplementary material for: Genetic Diversity of Genes Controlling Unilateral Incompatibility in Japanese Cultivars of Chinese Cabbage
Source: Plants (Basel). 2021 Nov 15;10(11):2467. doi: 10.3390/plants10112467 (PMC8619800; doi:10.3390/plants10112467)
Supplement: Supplementary file 1 [file plants-10-02467-s001.zip › Supplementary files_revise/TableS4.pdf]

Table S4. Accession number of SUI1 and SRK sequences used in phylogenetic analysis.

| Name              | Accession |
|-------------------|-----------|
| SRK <sup>9</sup>  | D30049    |
| SRK <sup>8</sup>  | D38563    |
| SRK <sup>12</sup> | D38564    |
| SRK <sup>29</sup> | AB008191  |
| SRK <sup>40</sup> | AB211197  |
| SRK <sup>44</sup> | AB201307  |
| SUI1-1            | LC088707  |
| SUI1-2            | LC088708  |
| SUI1-3            | LC088709  |
| SUI1-4            | LC088710  |
| SUI1-5            | LC088711  |
| SUI1-6            | LC088712  |
| SUI1-7            | LC088713  |
| SUI1-8            | LC088714  |
| SUI1-9            | LC088715  |
| SUI1-10           | LC641787  |
| SUI1-11           | LC641786  |
| SUI1-12           | LC641785  |
